# Supplementary material for: Barriers and facilitators in providing oral health care to nursing home residents, from the perspective of care aides—a systematic review protocol
Source: PubMed Central journal article supplement (PMC4823843; doi:10.1186/s13643-016-0231-7), 2016-04-07
Supplement: 13643_2016_231_MOESM2_ESM.pdf [file 13643_2016_231_MOESM2_ESM.pdf]

## Supplementary file 1: Search strategy

### MEDLINE 1946 to Present, MEDLINE(R) In-Process & Other Non-Indexed Citations, EBM Reviews - Cochrane Central Register of Controlled Trials (platform OVID)

1. exp Dentistry/

---

2. exp Tooth Diseases/

---

3. Oral Health/

---

4. Oral Hygiene/

---

5. ((oral or dental or mouth) adj (health or care or hygiene)).mp.

---

6. or/1-5

---

7. Nurses' Aides/

---

8. (Care aide\* or Care Attendant\* or Care Guide\* or paid caregiver\* or Certified Nursing Assistant\* or CNA\* or Client Care Attendant\* or Direct care worker\* or Client Care Attendant\* or Geriatric Health Aide\* or Health Care Assistant\* or Health Care Assistant\* or Institutional Aide\* or Medical Assistant\* or Nurses aide\* or Nursing assistant\* or Nursing attendant\* or Nursing home aide\* or Personal Care Attendant\*).tw.

---

9. (Personal Care Nurse\* or Personal Care Assistant\* or Personal Care Attendant\* or Personal support worker\* or Residential Aide\*).tw.

---

10. (caregiver\* and (nursing home\* or residence\* or residential or long term care or facility or facilities or institution\*)).mp.

---

11. or/7-10

---

12. 6 and 11

---

13. Geriatric Nursing/ or nursing homes/ or Intermediate Care Facilities/ or skilled nursing facilities/ or homes for the aged/ or "Institutionalization"/

---

14. (nursing adj (home\* or center\* or centre\* or facilit\*)).tw.

---

15. ((extended or long term or intermediate or skilled or assisted or supportive) adj care).tw.

---

16. ((extended or long term or intermediate or skilled or assisted or supportive) adj facilit\*).tw. or ((assisted) adj living).tw

---

17. ((elderly or senior\* or geriatric or veteran\*) adj3 (institution\* or home\* or facilit\* or unit\* or center\* or centre\*)).tw.

---

18. (rest adj2 home\*).tw.

---

19. convalescen\* home\*.tw.

---

20. assisted care facilit\*.tw.

---

21. continuing care.tw.

---

22. residential care.tw.

---

23. or/13-22

---

24. 6 and 23

25. exp Child/

---

26. (child\* or boy\* or girl\* or p?ediatric\* or teen\* or youth\* or adolescen\*).mp.

---

27. 25 or 26

---

28. exp aged/

---

29. (senior\* or elder\* or geriatric\* or gerontolog\*).mp.

---

30. 28 or 29

---

31. 27 and 30

---

32. 27 not 31

---

33. 24 not 32

---

34. 33 or 12

---

35. remove duplicates from 34

## CINAHL (platform EBSCOhost)

- S1 (MH "Dentistry+") OR (MH "Tooth Diseases+") OR (MH "Oral Health") OR (MH "Oral Hygiene+") OR (MH "Dental Hygiene")
- 
- S2 ( oral W0 (health or care or hygiene) ) OR ( dental W0 (health or care or hygiene) ) OR ( mouth W0 (health or care or hygiene) )
- 
- S3 S1 OR S2
- 
- S4 (MH "Nursing Assistants") OR (MH "Nursing Home Personnel")
- 
- S5 ( "Care aide\*" or "Care Attendant\*" or "Care Guide\*" or "paid caregiver\*" or "Certified Nursing Assistant\*" ) OR ( CNA\* or "Client Care Attendant\*" or "Direct care worker\*" or "Client Care Attendant\*" or "Geriatric Health Aide\*" ) OR ( "Health Care Assistant\*" or "Health Care Assistant\*" or "Institutional Aide\*" or "Medical Assistant\*" ) OR ( "Nurs\* aide\*" or "Nurs\* assistant\*" or "Nurs\* attendant\*" or "Nurs\* home aide\*" or "Personal Care Attendant\*" )
- 
- S6 "Personal Care Nurse\*" or "Personal Care Assistant\*" or "Personal Care Attendant\*" or "Personal support worker\*" or "Residential Aide\*"
- 
- S7 (MH "Gerontologic Nursing+") OR (MH "Nursing Homes+")
- 
- S8 (MH "Nursing Home Patients") OR (MH "Institutionalization+")
- 
- S9 nursing W0 (home\* or center\* or centre\* or facilit\*)
- 
- S10 "extended care" or "long term care" or "intermediate care" or "skilled care" or "assisted care" or "assisted living" or "supportive care"
- 
- S11 (extended or "long term" or intermediate or skilled or assisted or supportive) W2 facilit\*
- 
- S12 ( (elderly or senior\* or geriatric or veteran\*) N3 institution\* ) OR ( (elderly or senior\* or geriatric or veteran\*) N3 home\* ) OR ( (elderly or senior\* or geriatric or veteran\*) N3 facilit\* ) OR ( (elderly or senior\* or geriatric or veteran\*) N3 unit\* ) OR ( (elderly or senior\* or geriatric or veteran\*) N3 center\* ) OR ( (elderly or senior\* or geriatric or veteran\*) N3 centre\* )
- 
- S13 "rest home\*" OR "convalescen\* home\*" OR "assisted care facilit\*" OR "continuing care" OR "residential care"
- 
- S14 S4 OR S5 OR S6 OR S7 OR S8 OR S9 OR S10 OR S11 OR S12 OR S13
- 
- S15 S3 AND S14
- 
- S16 S3 AND S14  
Limiters - Research Article
- 
- S17 senior\* or older\* or gerontolog\* or geriatric\* or elder\*
- 
- S18 S16 AND S17
- 
- S19 S3 AND S14
- 
- S20 S18 OR S19

## Web of Science Core Collection

- #1 TS=("oral health" OR "oral care" OR "oral hygiene" OR dentistry OR "dental health" OR "dental care" OR "dental hygiene")
- 
- #2 TS=("Care aide\*" or "Care Attendant\*" or "Care Guide\*" or "paid caregiver\*" or "Certified Nursing Assistant\*" or CNA\* or "Client Care Attendant\*" or "Direct care worker\*" or "Geriatric Health Aide\*" or "Health Care Assistant\*" or "Health Care Assistant\*" or "Institutional Aide\*" or "Medical Assistant\*" or "Nurs\* aide\*" or "Nurs\* assistant\*" or "Nurs\* attendant\*" or "Nurs\* home aide\*" or "Personal Care Attendant\*" or "personal support worker\*")
- 
- #3 TS=("nursing home\*" or "residential care" or "continuing care" or facilit\* or residence or residential or "long term care" or institution\* or "assisted care" or "assisted living" or "supportive care")
- 
- #4 #2 OR #3
- 
- #5 #1 AND #4
